# Supplementary material
Source: PubMed Central journal article supplement (PMC4197881)
Supplement: embr0015-0705-sd2.pdf [file embr0015-0705-sd2.pdf]

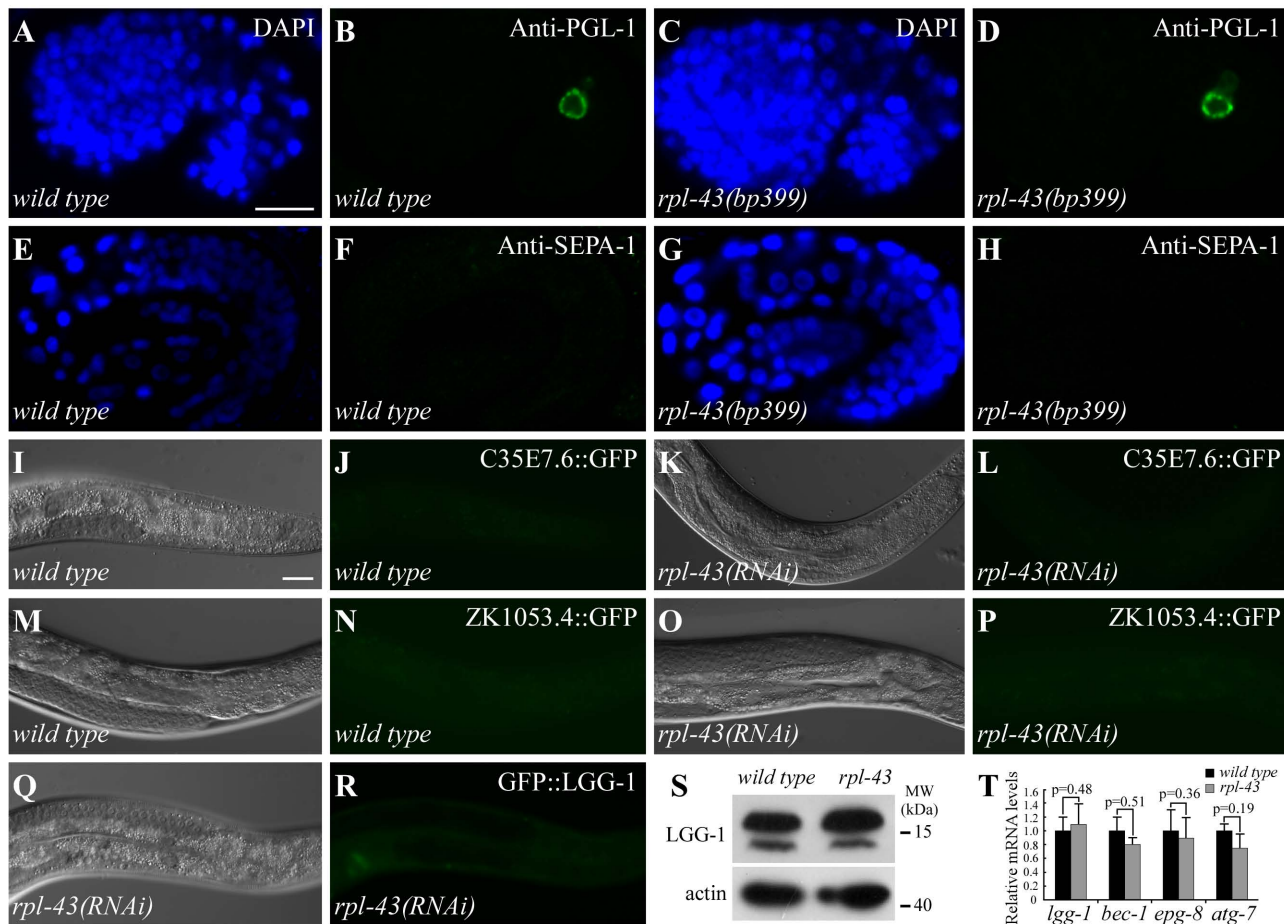

Figure S2

**Fig S2 Loss of function *rpl-43* did not impair degradation of other autophagy**

**substrates**

(A-D) PGL-1, detected by anti-PGL-1 antibody, is restricted to germline precursor cells and is absent in somatic cells in wild-type (A,B) and *rpl-43(bp399)* mutant (C,D) embryos. (A) and (C): DAPI images of the embryos shown in (B) and (D), respectively.

(E-H) SEPA-1, detected by anti-SEPA-1 antibody, did not accumulate in wild-type

(E,F) and *rpl-43(bp399)* mutant embryos (G,H) at the 4-fold stage. (E) and (G): (S) The endogenous LGG-1 level did not increase in *rpl-43(bp399)* mutant animals compared with wild type. 200 young adult animals for each genotype were DAPI images of the embryos shown in (F) and (H), respectively.

(I-L) C35E7.6::GFP is weakly expressed in intestinal cells in wild-type (I,J) and collected for analysis. *rpl-43(RNAi)* (K,L) animals. (I) and (K): DIC images of the animals shown in (J) and (L), respectively.

(M-P) ZK1053.4::GFP is weakly expressed in intestinal cells in wild-type (M,N) and *rpl-43(RNAi)* (O,P) animals. (M) and (O): DIC images of the animals shown in (N) and (P), respectively.

(Q-R) GFP::LGG-1 did not increase in *rpl-43(RNAi)* animals. (Q): DIC image of the animal shown in (R).

(S) The endogenous LGG-1 level did not increase in *rpl-43(bp399)* mutant animals compared with wild type. 200 young adult animals for each genotype were collected for analysis.

(T) mRNA levels of *lgg-1*, *bec-1*, *epg-8*, *atg-7* did not change significantly in *rpl-43(bp399)* animals compared with wild type. 500 young adult animals were collected for analysis. Error bars indicate the s.d. of three experiments.

Scale bars: 10  $\mu\text{m}$  (A-H); 20  $\mu\text{m}$  (I-R).
