# Supplementary material
Source: PubMed Central journal article supplement (PMC4197881)
Supplement: embr0015-0705-sd3.pdf [file embr0015-0705-sd3.pdf]

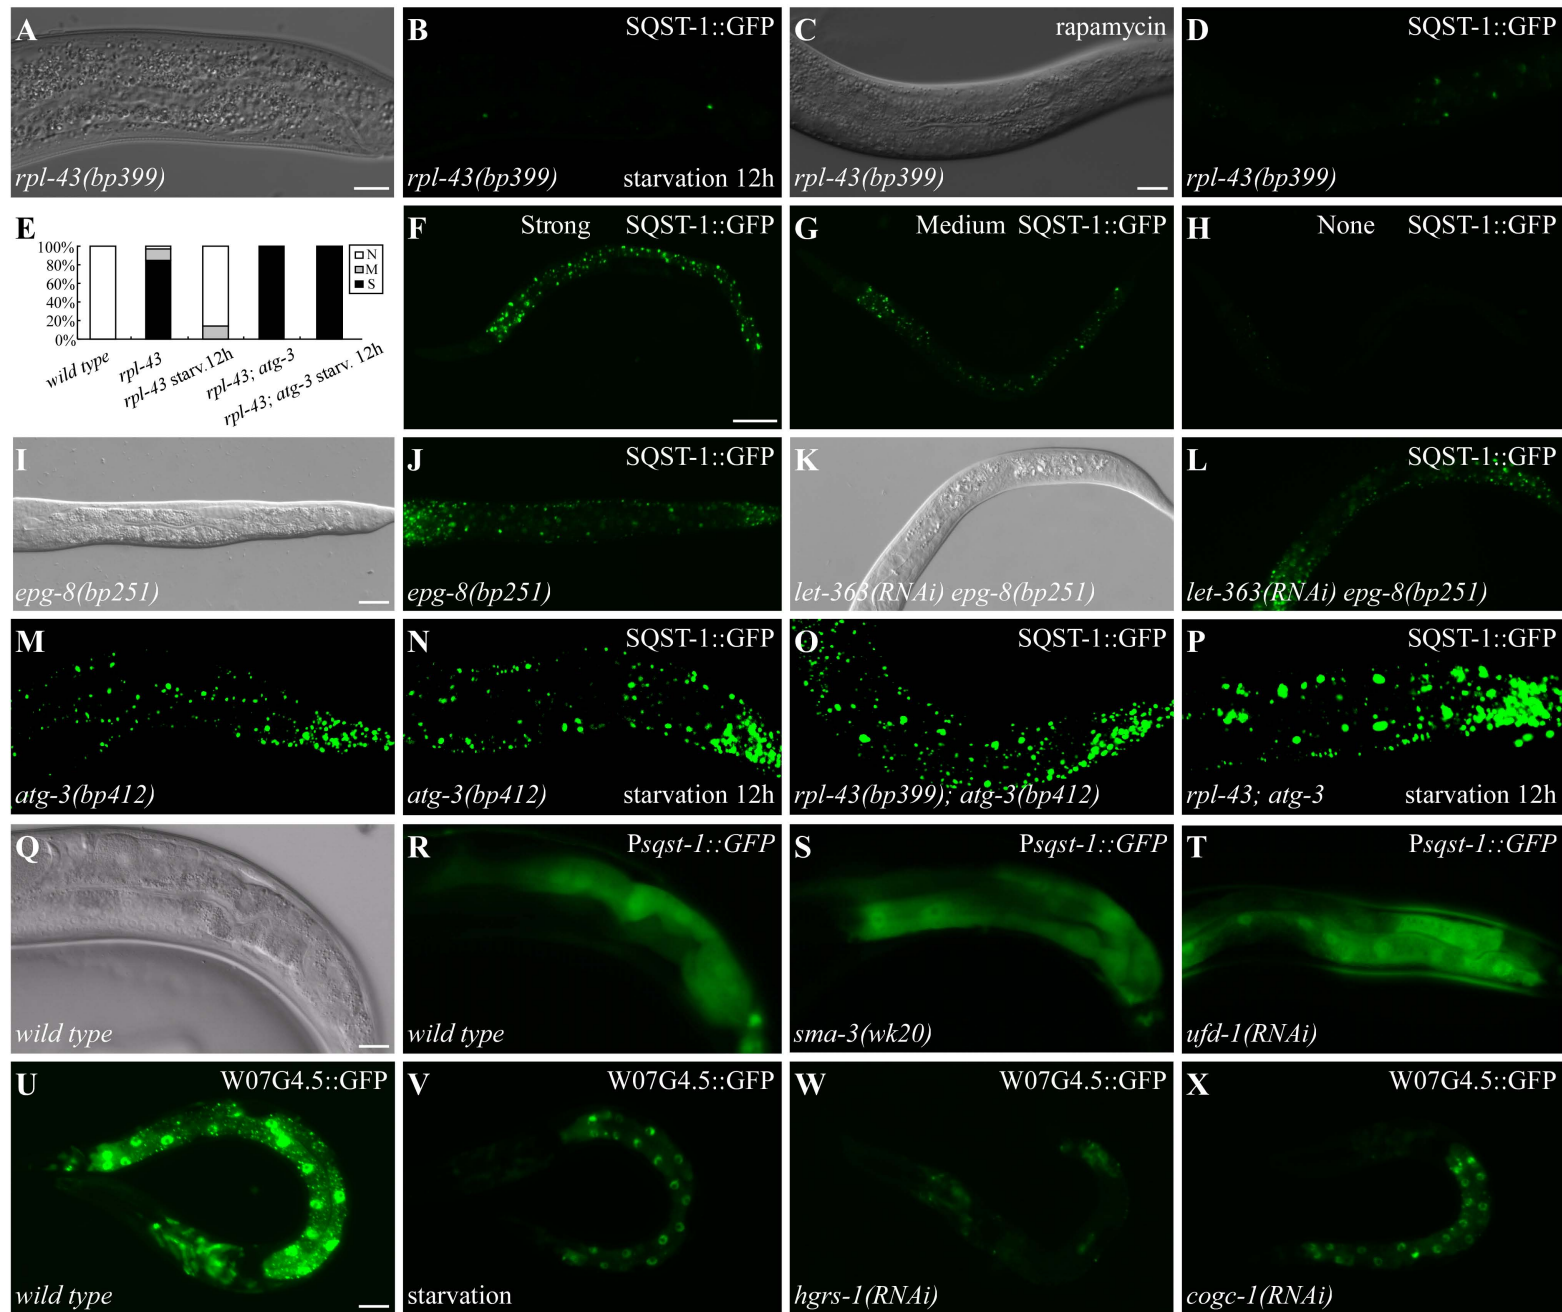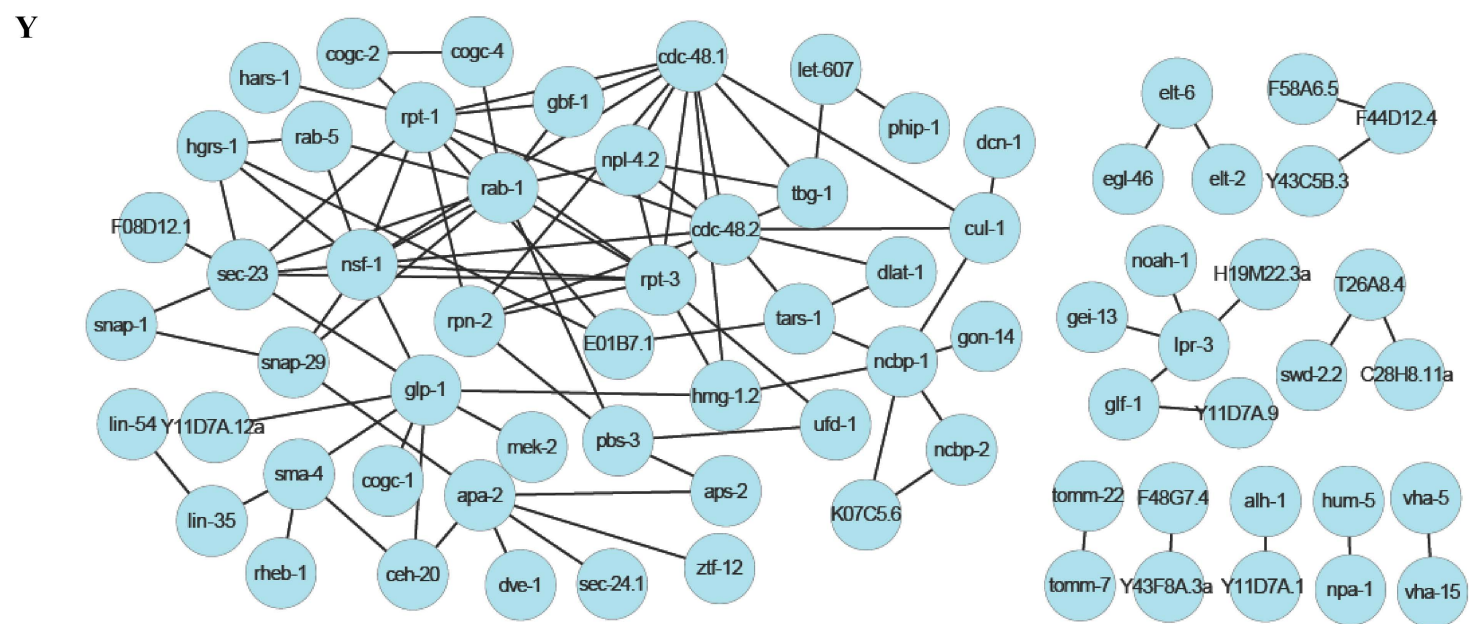

Figure S3

**Fig S3| RNAi inactivation of a variety of signaling factors results in suppression of the SQST-1 accumulation phenotype in *rpl-43* mutants**

(A-D) SQST-1::GFP aggregates in *rpl-43(bp399)* mutants disappear after 12 hours starvation (A,B) or rapamycin treatment (C,D). (A) and (C): DIC images of the animals shown in (B) and (D), respectively.

(E) Percentage of animals with different levels of SQST-1::GFP aggregate accumulation. S: many SQST-1::GFP aggregates were detected in all intestinal cells, as in the *rpl-43(bp399)* mutant intestine; M: fewer SQST-1::GFP aggregates were present in some but not all intestinal cells; N: no or very few SQST-1::GFP aggregates were observed in the intestinal cells. At least thirty animals were examined in each group.

(F-H) Examples of the three different levels of SQST-1::GFP aggregate accumulation that were used for classification. (F): strong. (G): medium. (H): none.

(I-L) *let-363(RNAi)* does not suppress the SQST-1::GFP aggregate accumulation phenotype in *epg-8(bp251)* mutants. (I) and (K): DIC images of the animals shown in (J) and (L), respectively.

(M-N) SQST-1::GFP aggregates in *atg-3(bp412)* mutants persist after 12 hours starvation.

(O-P) SQST-1::GFP aggregates accumulate in the intestine in *rpl-43(bp399)*; *atg-3(bp412)* mutants (O), and persist after 12 hours starvation (P).

(Q-T) Expression of *Psqst-1::GFP* in the intestine in wild-type animals and *sma-3(wk20)* and *ufd-1(RNAi)* mutants. *Psqst-1::GFP* expression is unchanged in the mutants. (Q): DIC image of the animal shown in (R).

(U) W07G4.5::GFP accumulates into a large number of aggregates in the cytoplasm in the intestine in wild-type L1 larvae. W07G4.5::GFP is also strongly expressed in the nucleus.

(V) Upon starvation, levels of W07G4.5::GFP in L1 larvae are dramatically decreased and the aggregates in the cytoplasm largely disappear.

(W-X) Levels of W07G4.5::GFP are dramatically decreased in *hgrs-1(RNAi)* and *cogc-1(RNAi)* animals.

(Y) Functional interactions among genes which, when inactivated, suppress the SQST-1 accumulation phenotype in *rpl-43(bp399)* mutant larvae.

Scale bars: 10  $\mu\text{m}$  (A,B,M-P); 100  $\mu\text{m}$  (F-H); 20  $\mu\text{m}$  (C,D,I-L,Q-X).
