# Supplementary material
Source: PubMed Central journal article supplement (PMC4197881)
Supplement: embr0015-0705-sd4.pdf [file embr0015-0705-sd4.pdf]

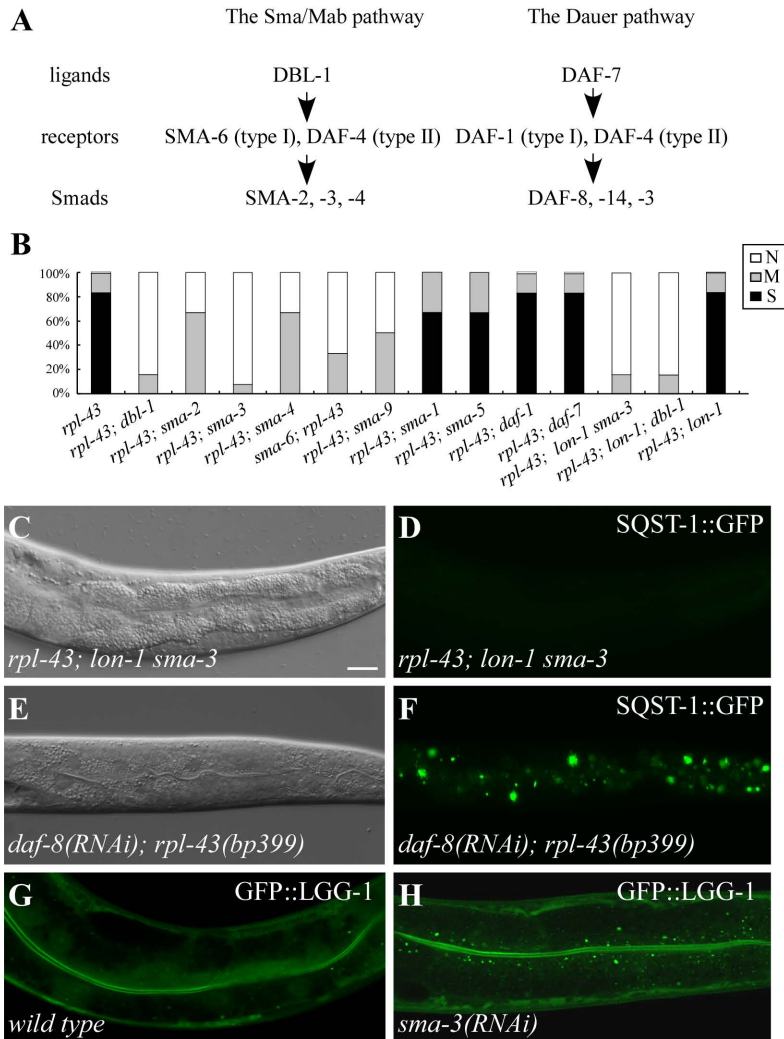

Figure S4

**Fig S4| Loss of function of Sma/Mab TGF- $\beta$  signaling suppresses the SQST-1 accumulation phenotype in *rpl-43* mutants**

(A) Components of the Sma/Mab and Dauer TGF- $\beta$  pathways in *C. elegans*.

(B) Percentage of indicated mutant animals with different levels of SQST-1::GFP aggregate accumulation. S: strong. M: medium. N: none. At least thirty animals were examined in each group.

(C-D) SQST-1::GFP aggregates are absent in *rpl-43(bp399); lon-1(RNAi)* *sma-3(wk20)* mutant animals.

(E-F) SQST-1::GFP accumulates into a large number of aggregates in *daf-8(RNAi); rpl-43(bp399)* mutant animals. (C) and (E): DIC images of the animals shown in (D) and (F), respectively.

(G-H) Compared to wild-type animals (G), the number of GFP::LGG-1 puncta is increased in *sma-3(RNAi)* animals (H). Scale bars: 20  $\mu$ m (C-H).
