# Supplementary material
Source: PubMed Central journal article supplement (PMC4197881)
Supplement: embr0015-0705-sd6.pdf [file embr0015-0705-sd6.pdf]

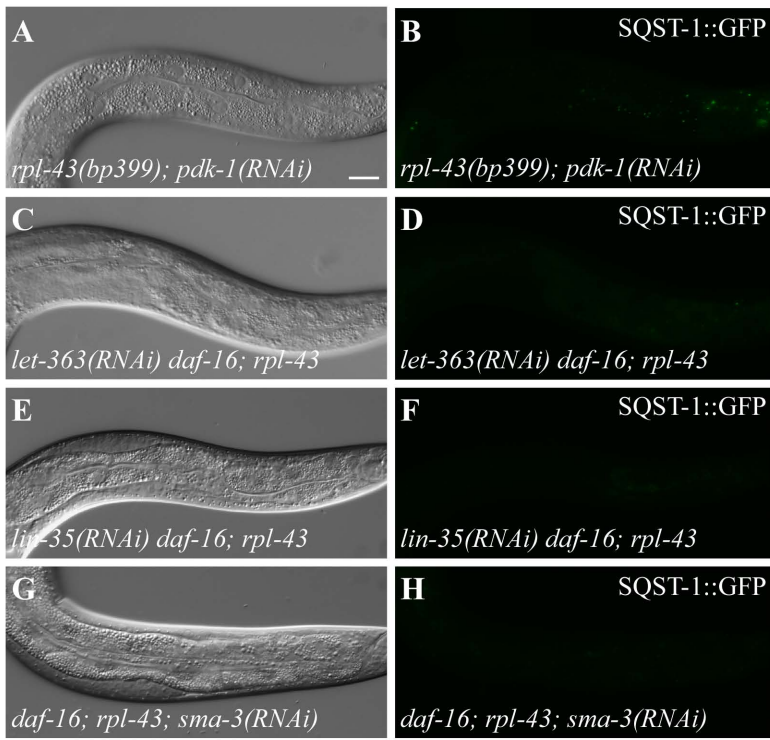

**I**

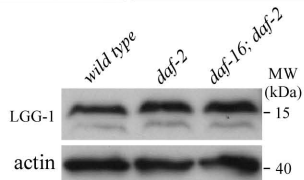

**J**

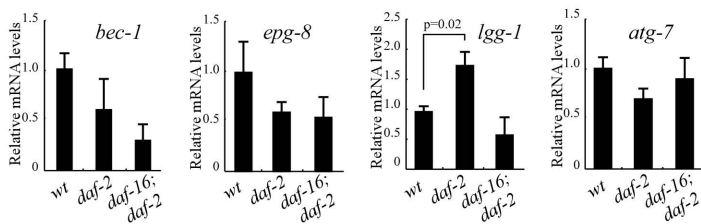

**K**

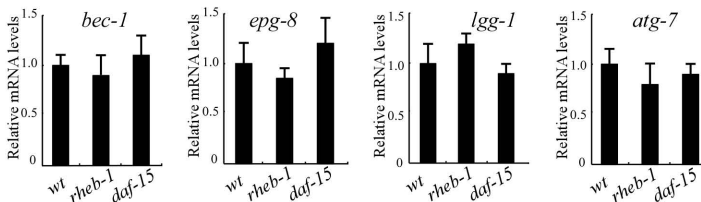

Figure S6

**Fig S6| Loss of function of *daf-2* signaling suppresses the SQST-1 accumulation phenotype in *rpl-43* mutants**

(A-B) *pdk-1(RNAi)* suppresses the accumulation of SQST-1::GFP aggregates in *rpl-43(bp399)* mutants.

(C-H) Loss of function of *daf-16* does not restore the SQST-1::GFP aggregates in *let-363(RNAi); rpl-43(bp399)*, *lin-35(RNAi); rpl-43(bp399)* and *rpl-43(bp399); sma-3(RNAi)* mutant animals. (A), (C), (E) and (G): DIC images of the animals shown in (B), (D), (F) and (H), respectively.

(I) Levels of LGG-1 are not evidently elevated in *daf-2(e1370)* mutant animals. 200 young adult animals for each genotype were collected for analysis.

(J) mRNA levels of *bec-1*, *epg-8*, *lgg-1* and *atg-7* in wild type (wt), *daf-2(e1370)* and *daf-16(mu86); daf-2(e1370)* mutant animals. 500 young adult animals were collected for analysis. Error bars indicate the s.d. of three experiments.

(K) mRNA levels of *bec-1*, *epg-8*, *lgg-1* and *atg-7* in wild type, *rheb-1(RNAi)* and *daf-15(RNAi)* animals. 500 young adult animals were collected for analysis. Error bars indicate the s.d. of three experiments.

Scale bars: 20  $\mu$ m (A-H).
