# Supplementary material
Source: PubMed Central journal article supplement (PMC4197881)
Supplement: embr0015-0705-sd9.pdf [file embr0015-0705-sd9.pdf]

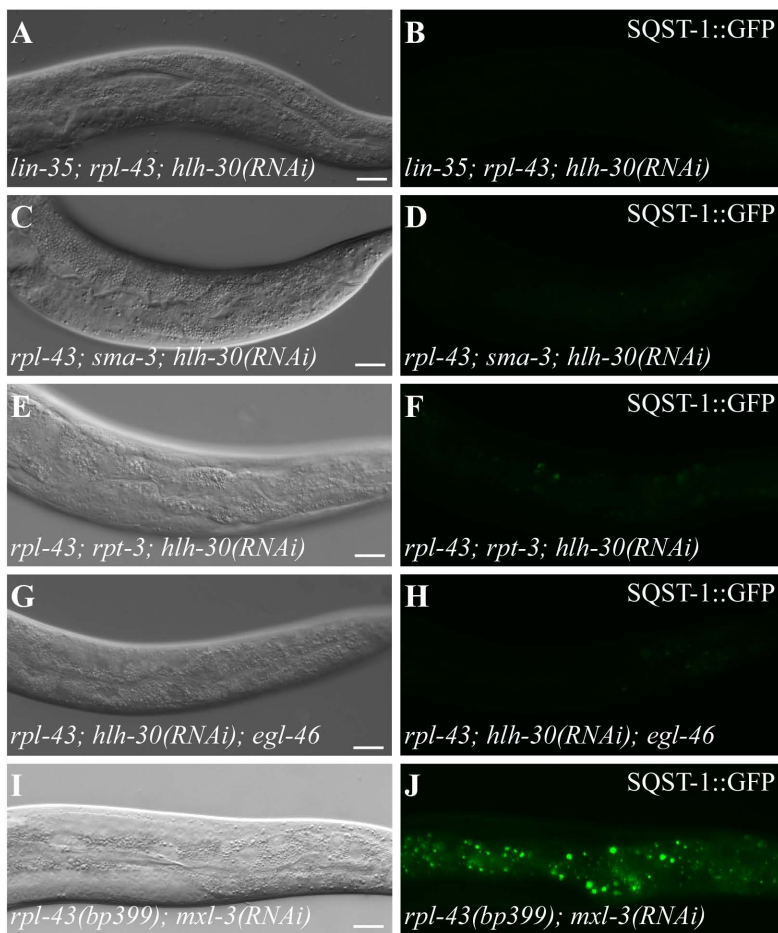

Figure S9

**Fig S9| The *lin-35*, Sma TGF- $\beta$ , ER stress and mitochondrial stress pathways  
activate autophagy activity independent of *hll-30***

(A-H) Loss of function of *hll-30* has no effect on the suppression of *rpl-43(bp399)* mutants by loss of activity of *lin-35* (A,B), *sma-3* (C,D), *rpt-3* (E,F) or *egl-46* (G,H).

(I-J) Loss of function of *mxl-3* fails to suppress the accumulation of SQST-1::GFP aggregates in *rpl-43(bp399)* mutants.

(A), (C), (E), (G) and (I): DIC images of the animals shown in (B), (D), (F), (H) and (J), respectively. Scale bars: 20  $\mu$ m.
