# Supplementary material
Source: PubMed Central journal article supplement (PMC4197881)
Supplement: embr0015-0705-sd10.pdf [file embr0015-0705-sd10.pdf]

**Table S1. Loss of function of ribosomal components, ribosomal maturation factors and translational factors causes accumulation of SQST-1::GFP aggregates in the intestine**

| Process     | Sequence name | Gene name       | Brief description of gene product                 |
|-------------|---------------|-----------------|---------------------------------------------------|
| Translation | F53G12.10     | <i>rpl-7</i>    | 60S ribosomal protein L7                          |
| Translation | F28H1.3       | <i>ars-2</i>    | a predicted cytoplasmic alanyl-tRNA synthetase    |
| Translation | D1007.6       | <i>rps-10</i>   | ribosomal protein, small subunit family member    |
| Translation | D1007.12      | <i>rpl-24.1</i> | ribosomal protein, large subunit family member    |
| Translation | C09D4.5       | <i>rpl-19</i>   | ribosome large subunit protein                    |
| Translation | T08B2.9       | <i>fars-1</i>   | predicted phenylalanyl-tRNA synthetase            |
| Translation | T08B2.10      | <i>rps-17</i>   | ribosome small subunit protein                    |
| Translation | K07A12.4      |                 | elongation factor 1 alpha-like protein            |
| Translation | F25H5.4       | <i>eft-2</i>    | elongation factor family member                   |
| Translation | C03D6.8       | <i>rpl-24.2</i> | a large ribosomal subunit protein                 |
| Translation | C04F12.4      | <i>rpl-14</i>   | a large ribosomal subunit protein                 |
| Translation | Y106G6H.3     | <i>rpl-30</i>   | a large ribosomal subunit protein                 |
| Translation | F25H2.10      | <i>rpa-0</i>    | replication protein A homolog family member       |
| Translation | C47B2.5       | <i>eif-6</i>    | eukaryotic translation initiation factor 6        |
| Translation | Y105E8A.16    | <i>rps-20</i>   | ribosome small subunit protein                    |
| Translation | Y39G10AR.8    |                 | translation initiation factor 2, gamma subunit    |
| Translation | Y48G8AL.8     | <i>rpl-17</i>   | a large ribosomal subunit protein                 |
| Translation | Y71F9AL.13    | <i>rpl-1</i>    | 60S ribosomal protein L10A                        |
| Translation | B0432.3       | <i>mrpl-41</i>  | mitochondrial ribosomal protein L27               |
| Translation | T27F7.3       | <i>eif-1</i>    | translation initiation factor 1                   |
| Translation | C27A2.2       | <i>rpl-22</i>   | a large ribosomal subunit protein                 |
| Translation | C29H12.1      | <i>rars-2</i>   | arginyl-tRNA synthetase                           |
| Translation | C15F1.4       | <i>ppp-1</i>    | translation initiation factor 2B, gamma subunit   |
| Translation | F10E7.7       | <i>rpl-33</i>   | large ribosomal subunit L35a protein              |
| Translation | D2085.3       |                 | translation initiation factor 2B, epsilon subunit |
| Translation | F28C26.7      | <i>rpl-26</i>   | large ribosomal subunit L26 protein               |
| Translation | C09H10.2      | <i>rpl-41</i>   | large ribosomal subunit L41 protein               |
| Translation | F40F8.10      | <i>rps-9</i>    | small ribosomal subunit S9 protein                |
| Translation | Y48B6A.2      | <i>rpl-43</i>   | large ribosomal subunit L37a protein              |
| Translation | W01D2.1       |                 | 60S ribosomal protein L37                         |
| Translation |               | <i>rpl-37</i>   | ribosome large subunit protein                    |
| Translation | B0412.4       | <i>rps-29</i>   | ribosome small subunit protein                    |
| Translation | H06I04.4      | <i>ubl-1</i>    | ubiquitin/40S ribosomal protein S27a fusion       |
| Translation |               | <i>rps-29</i>   | ribosome small subunit protein                    |
| Translation | C54C6.1       | <i>rpl-37</i>   | ribosome large subunit protein                    |
| Translation | F56F3.5       | <i>rps-1</i>    | 40S ribosomal protein S3A                         |

|             |           |                 |                                                            |
|-------------|-----------|-----------------|------------------------------------------------------------|
| Translation | B0393.1   | <i>rps-0</i>    | structural constituents of ribosome                        |
| Translation | T04A8.11  |                 | structural constituents of ribosome                        |
| Translation | C23G10.3  | <i>rps-3</i>    | ribosome small subunit protein                             |
| Translation | C16A3.9   | <i>rps-13</i>   | 40S ribosomal protein S13                                  |
| Translation | F37C12.9  | <i>rps-14</i>   | ribosome small subunit protein                             |
| Translation | R151.3    | <i>rpl-6</i>    | ribosome large subunit protein                             |
| Translation | R13A5.8   | <i>rpl-9</i>    | ribosome large subunit protein                             |
| Translation | C27D11.1  | <i>egl-45</i>   | translation initiation factor 3, subunit a (eIF-3a)        |
| Translation | ZK652.4   | <i>rpl-35</i>   | ribosome large subunit protein                             |
| Translation | C30C11.1  |                 | mitochondrial ribosomal protein L32                        |
| Translation | Y66H1A.3  | <i>tag-313</i>  | mitochondrial ribosomal protein L55                        |
| Translation | E04A4.8   | <i>rpl-20</i>   | ribosome large subunit protein                             |
| Translation | C49H3.11  | <i>rps-2</i>    | 40S ribosomal protein S2/30S                               |
| Translation | T05E11.1  | <i>rps-5</i>    | ribosomal protein S7                                       |
| Translation | F40F11.1  | <i>rps-11</i>   | 40S ribosomal protein S11                                  |
| Translation | Y62E10A.1 | <i>rla-2</i>    | 60S acidic ribosomal protein P2                            |
| Translation | Y41D4B.5  | <i>rps-28</i>   | a small ribosomal subunit S28 protein                      |
| Translation | F56E10.4  | <i>rps-27</i>   | 40s ribosomal protein S27                                  |
| Translation | T22F3.4   | <i>rpl-11.1</i> | a large ribosomal subunit L11 protein                      |
| Translation | C26F1.9   | <i>rpl-39</i>   | ribosome large subunit protein                             |
| Translation | F11A3.2   |                 | translation initiation factor 2B, delta subunit            |
| Translation | T01C3.6   | <i>rps-16</i>   | ribosome small subunit protein                             |
| Translation | Y39B6A.36 |                 | transcription initiation factor IIF, small subunit (RAP30) |
| Translation | B0250.1   | <i>rpl-2</i>    | ribosome large subunit protein                             |
| Translation | F07D10.1  | <i>rpl-11.2</i> | ribosome large subunit protein                             |
| Translation | F55D10.2  | <i>rpl-25.1</i> | ribosome large subunit protein                             |
