# Supplementary material
Source: PubMed Central journal article supplement (PMC4197881)
Supplement: embr0015-0705-sd11.pdf [file embr0015-0705-sd11.pdf]

**Table S2 Complete list of RNAi inactivations that lead to suppression of the accumulation of SQST-1::GFP aggregates in the intestine in *rpl-43* mutants**

| Process   | Sequence name | Gene name      | Brief description of gene product                                 | Level | Larval arrest |
|-----------|---------------|----------------|-------------------------------------------------------------------|-------|---------------|
| Signaling | F54C8.5       | <i>rheb-1</i>  | orthologous to the mammalian Rheb and Rheb1 GTPases               | 3     |               |
| Signaling | R13F6.9       | <i>sma-3</i>   | a Smad protein                                                    | 2     |               |
| Signaling | R12B2.1       | <i>sma-4</i>   | a Smad protein                                                    | 2     |               |
| Signaling | F02A9.6       | <i>glp-1</i>   | N-glycosylated transmembrane protein                              | 2     |               |
| Signaling | T20F10.1      | <i>wts-1</i>   | Warts/lats-like serine threonine kinase                           | 2     |               |
| Signaling | Y11D7A.9      |                | FGF receptor activating protein 1                                 | 2     |               |
| Signaling | F56B3.2       |                | a protein containing Ca <sup>2+</sup> -binding EGF-like domains   | 2     |               |
| Signaling | Y6E2A.2       | <i>str-101</i> | a seven-TM receptor                                               | 2     |               |
| Signaling | ZK1193.5      | <i>dve-1</i>   | a protein with a COMPASS domain and two homeodomains              | 2     |               |
| Signaling | M03F4.6       |                | a protein containing Ca <sup>2+</sup> -binding EGF-like domains   | 2     |               |
| Signaling | F42G8.8       |                | serine/threonine-protein phosphatase PP1                          | 2     |               |
| Signaling | F08C6.1       | <i>adt-2</i>   | disintegrin metalloproteinase with thrombospondin repeats         | 2     |               |
| Signaling | C09D1.1       | <i>unc-89</i>  | Ca <sup>2+</sup> /calmodulin-dependent protein kinase             | 2     |               |
| Signaling | C36B1.8       | <i>gls-1</i>   | transducer of the stress-activated PKC1-MPK1 signaling pathway    | 2     |               |
| Signaling | Y54E10BL.6    | <i>mek-2</i>   | mitogen-activated protein kinase kinase                           | 2     |               |
| Signaling | H04M03.8      | <i>srv-21</i>  | a class V serpentine receptor                                     | 2     |               |
| Signaling | C13B7.3       | <i>srd-60</i>  | a class D serpentine receptor                                     | 2     |               |
| Signaling | F22E5.15      | <i>sri-55</i>  | a class I serpentine receptor                                     | 2     |               |
| Signaling | K08G2.8       | <i>srh-293</i> | a class H serpentine receptor                                     | 2     |               |
| Signaling | F47H4.3       | <i>srz-46</i>  | a class Z serpentine receptor                                     | 1     |               |
| Signaling | C34E10.2      | <i>gop-2</i>   | a member of the conserved hypothetical ATP binding protein family | 2     |               |
| Signaling | R02F2.2       |                | Rho guanine nucleotide exchange factor 17                         | 2     |               |
| Signaling | F36A2.8       | <i>phip-1</i>  | 14 kDa phosphohistidine                                           | 2     |               |

|                  |           |                 |                                                                                 |   |   |
|------------------|-----------|-----------------|---------------------------------------------------------------------------------|---|---|
|                  |           |                 | phosphatase                                                                     |   |   |
| Signaling        | W04G3.8   | <i>lpr-3</i>    | a secreted protein that bind and transport lipophilic molecules                 | 1 | + |
| Protein turnover | Y38A8.2   | <i>pbs-3</i>    | a B-type subunit of the 20S protease core particle of the 26S proteasome        | 1 | + |
| Protein turnover | F23F12.6  | <i>rpt-3</i>    | an AAA ATPase subunit of the 19S regulatory particle of the 26S proteasome      | 3 | + |
| Protein turnover | C52E4.4   | <i>rpt-1</i>    | one of six ATPases of the 19S regulatory particle of the 26S proteasome         | 2 | + |
| Protein turnover | C23G10.4  | <i>rpn-2</i>    | subunit RPN2/PSMD1 of the 26S proteasome regulatory complex                     | 2 |   |
| Protein turnover | F19B6.2   | <i>ufd-1</i>    | protein involved in recognition of polyubiquitinated proteins                   | 2 |   |
| Protein turnover | F59E12.5  | <i>npl-4.2</i>  | ubiquitin-binding protein involved in protein degradation                       | 2 |   |
| Protein turnover | C06A1.1   | <i>cdc-48.1</i> | an AAA ATPase homologous to yeast Cdc48 and mammalian p97/VCP                   | 2 |   |
| Protein turnover | C41C4.8   | <i>cdc-48.2</i> | an AAA ATPase that is one of two <i>C. elegans</i> p97/VCP/CDC48 homologs       | 2 |   |
| Protein turnover | D2045.6   | <i>cul-1</i>    | cullin                                                                          | 1 |   |
| Protein turnover | E01B7.1   |                 | putative ubiquitin-specific protease                                            | 2 |   |
| Protein turnover | M18.6     |                 | predicted ATP-dependent protease PIL, contains LON domain                       | 2 |   |
| Protein turnover | H38K22.2  | <i>dcn-1</i>    | a protein containing UBA-like ubiquitin ligase and DUF298 domains               | 2 |   |
| Protein turnover | T08A9.4   |                 | a protein containing an F-box                                                   | 2 |   |
| Protein turnover | Y39C12A.1 |                 | predicted proteasome-interacting protein                                        | 2 |   |
| Transcription    | F47D12.4  | <i>hmg-1.2</i>  | HMG box-containing protein                                                      | 2 |   |
| Transcription    | F31E3.1   | <i>ceh-20</i>   | homeobox family member                                                          | 2 |   |
| Transcription    | K11G9.4   | <i>egl-46</i>   | a predicted transcription factor and member of a TFIIA-like zinc finger protein | 2 |   |
| Transcription    | C01B7.1   | <i>ztf-12</i>   | zinc finger transcription factor family                                         | 2 |   |

|                     |           |                |                                                                                       |   |   |
|---------------------|-----------|----------------|---------------------------------------------------------------------------------------|---|---|
| Transcription       | F58A4.11  | <i>gei-13</i>  | a protein with a BED finger domain                                                    | 3 |   |
| Transcription       | R06C7.7   | <i>lin-61</i>  | polycomb group protein SCM/L(3)MBT                                                    | 2 |   |
| Transcription       | C32F10.2  | <i>lin-35</i>  | the <i>C. elegans</i> retinoblastoma protein (Rb) ortholog                            | 2 |   |
| Transcription       | JC8.6     | <i>lin-54</i>  | metallothionein-like protein                                                          | 2 |   |
| Transcription       | T26A8.4   |                | a component of the conserved Ccr4-Not deadenylase complex                             | 2 |   |
| Transcription       | Y65B4BR.5 | <i>icd-2</i>   | transcription factor containing NAC and TS-N domains                                  | 2 |   |
| Transcription       | F44C4.4   | <i>gon-14</i>  | a protein with similarity to LIN-15B, a class B synMuv protein                        | 2 |   |
| Transcription       | F52C12.5  | <i>elt-6</i>   | GATA-4/5/6 transcription factor                                                       | 2 |   |
| Transcription       | F44C4.2   | <i>nhr-37</i>  | nuclear hormone receptor                                                              | 1 |   |
| Transcription       | D2021.1   | <i>utx-1</i>   | general transcriptional co-repressor                                                  | 1 |   |
| Transcription       | C33D3.1   | <i>elt-2</i>   | GATA-type transcription factor                                                        | 2 | + |
| Transcription       | F57B10.1  | <i>let-607</i> | CREB/ATF family transcription factor                                                  | 1 | + |
| Protein trafficking | C07G1.5   | <i>hgrs-1</i>  | membrane trafficking and cell signaling protein HRS                                   | 2 |   |
| Protein trafficking | ZK652.2   | <i>tomm-7</i>  | translocase of outer mitochondrial membrane complex                                   | 2 |   |
| Protein trafficking | W10D9.5   | <i>tomm-22</i> | translocase of outer mitochondrial membrane complex                                   | 2 |   |
| Protein trafficking | E04A4.5   |                | mitochondrial import inner membrane translocase                                       | 2 |   |
| Protein trafficking | F35H10.4  | <i>vha-5</i>   | subunit a of the vacuolar H <sup>+</sup> -ATPase V0 sector                            | 3 |   |
| Protein trafficking | T14F9.1   | <i>vha-15</i>  | subunit H of the V1 peripheral membrane domain of the vacuolar H <sup>+</sup> -ATPase | 2 | + |
| Protein trafficking | Y54E10A.4 | <i>cogc-1</i>  | a subunit of lobe A of the conserved oligomeric Golgi complex                         | 3 |   |
| Protein trafficking | C06G3.10  | <i>cogc-2</i>  | a subunit of lobe A of the conserved oligomeric Golgi complex                         | 2 |   |
| Protein trafficking | Y71F9AM.4 | <i>cogc-3</i>  | a subunit of lobe A of the conserved oligomeric Golgi complex                         | 3 |   |

|                     |           |                 |                                                                                     |   |   |
|---------------------|-----------|-----------------|-------------------------------------------------------------------------------------|---|---|
| Protein trafficking | Y51H7C.6  | <i>cogc-4</i>   | a subunit of lobe A of the conserved oligomeric Golgi complex                       | 1 |   |
| Protein trafficking | D1014.3   | <i>snap-1</i>   | peripheral membrane protein required for vesicular transport between ER and Golgi   | 2 | + |
| Protein trafficking | K02D10.5  | <i>snap-29</i>  | SNAP-25                                                                             | 2 |   |
| Protein trafficking | CD4.4     | <i>vps-37</i>   | a member of the endosomal sorting ESCRT-I complex                                   | 2 |   |
| Protein trafficking | VC5.3     | <i>npa-1</i>    | essential protein involved in intracellular protein transport                       | 2 |   |
| Protein trafficking | H06O01.3  | <i>ctg-1</i>    | phosphatidylinositol transfer protein SEC14                                         | 2 |   |
| Protein trafficking | C24H11.7  | <i>gbf-1</i>    | Golgi-specific brefeldin A-resistance guanine nucleotide exchange factor 1          | 1 |   |
| Protein trafficking | F02E8.3   | <i>aps-2</i>    | small subunit of the clathrin adaptor complex                                       | 1 |   |
| Protein trafficking | T20B5.1   | <i>apa-2</i>    | alpha subunit of the vesicle coat complex AP-2                                      | 2 |   |
| Protein trafficking | Y113G7A.3 | <i>sec-23</i>   | component of the Sec23p-Sec24p heterodimeric complex of the COPII vesicle coat      | 2 | + |
| Protein trafficking | F12F6.6   | <i>sec-24.1</i> | one of two <i>C. elegans</i> Sec24 homologs                                         | 2 | + |
| Protein trafficking | C39F7.4   | <i>rab-1</i>    | an ortholog of the small Ras-like GTPase Rab1                                       | 2 | + |
| Protein trafficking | F26H9.6   | <i>rab-5</i>    | GTPase Rab5/YPT51 and related small G protein superfamily GTPases                   | 1 | + |
| Protein trafficking | F08D12.1  |                 | a protein that functions in targeting nascent secretory proteins to the ER membrane | 2 |   |
| Protein trafficking | H15N14.2  | <i>nsf-1</i>    | ATPase required for the release of Sec17p                                           | 1 |   |
| Metabolism          | F54D8.3   | <i>alh-1</i>    | aldehyde dehydrogenase                                                              | 2 |   |
| Metabolism          | C28H8.11  |                 | tryptophan 2,3-dioxygenase                                                          | 2 |   |
| Metabolism          | C04C3.3   | <i>pdhb-1</i>   | pyruvate dehydrogenase complex E1 beta subunit                                      | 2 |   |
| Metabolism          | H04M03.4  | <i>glf-1</i>    | UDP-galactopyranose mutase predicted to synthesize galactofuranose                  | 2 |   |

|            |           |               |                                                                                        |   |   |
|------------|-----------|---------------|----------------------------------------------------------------------------------------|---|---|
| Metabolism | T11G6.2   |               | permease of the major facilitator superfamily                                          | 2 |   |
| Metabolism | F52B11.2  |               | orthologous to the human gene phosphomannomutase 2                                     | 2 |   |
| Metabolism | F07G11.9  |               | chitinase activity                                                                     | 2 |   |
| Metabolism | F53F4.5   | <i>fmo-4</i>  | flavin-containing monooxygenase family member                                          | 2 |   |
| Metabolism | F38E9.4   |               | a protein involved in lipid storage                                                    | 2 |   |
| Metabolism | F56C11.3  |               | mitochondrial sulfhydryl oxidase involved in the biogenesis of cytosolic Fe/S proteins | 2 |   |
| Metabolism | F37E3.1   | <i>ncbp-1</i> | nuclear cap-binding protein complex                                                    | 2 |   |
| Metabolism | F26A3.2   | <i>ncbp-2</i> | nuclear cap-binding protein complex                                                    | 2 |   |
| Metabolism | K02F3.2   |               | mitochondrial amino acid transporter                                                   | 1 |   |
| Metabolism | D1009.1   | <i>acs-22</i> | a protein homologous to the mammalian fatty acid transport proteins                    | 1 |   |
| Metabolism | K04E7.2   | <i>pep-2</i>  | a low affinity/high capacity oligopeptide transporter                                  | 3 |   |
| Metabolism | F23B12.5  | <i>dlat-1</i> | orthologous to the human gene dihydrolipoamide dehydrogenase                           | 2 | + |
| Metabolism | C47D12.6  | <i>tars-1</i> | a threonyl-tRNA synthetase                                                             | 1 | + |
| Metabolism | F26F4.10  | <i>rars-1</i> | an arginyl-tRNA synthetase                                                             | 1 | + |
| Metabolism | T11G6.1   | <i>hars-1</i> | cytoplasmic and mitochondrial histidyl-tRNA synthetase                                 | 2 | + |
| Metabolism | H19M22.3  |               | gelatinase A and related matrix metalloprotease                                        | 2 | + |
| Metabolism | Y43F8A.3  |               | neutral cholesterol ester hydrolase 1                                                  | 2 |   |
| Metabolism | C25A1.6   | <i>nola-3</i> | H/ACA ribonucleoprotein complex subunit 3                                              | 1 |   |
| Others     | F58A4.8   | <i>tbg-1</i>  | gamma tubulin                                                                          | 2 |   |
| Others     | T05A7.7   |               | keratin                                                                                | 1 |   |
| Others     | F49C12.12 |               | ribonuclease kappa                                                                     | 1 | + |
| Others     | K07C5.6   |               | RNA splicing factor                                                                    | 2 | + |
| Others     | ZK617.1   | <i>unc-22</i> | twitchin                                                                               | 1 |   |
| Others     | K07D8.1   | <i>mup-4</i>  | a novel protein required for junctional attachments between hypodermis and muscle      | 2 |   |
| Others     | Y43C5B.3  |               | predicted mitochondrial carrier                                                        | 2 |   |

|         |           |                |                                                   |   |  |
|---------|-----------|----------------|---------------------------------------------------|---|--|
|         |           |                | protein                                           |   |  |
| Others  | F28D1.5   | <i>thn-2</i>   | pathogenesis related protein, group 5             | 2 |  |
| Others  | C36H8.3   | <i>flp-9</i>   | predicted FMRFamide-like peptide neurotransmitter | 2 |  |
| Others  | Y46C8AL.4 | <i>clec-71</i> | C-type lectin                                     | 2 |  |
| Others  | F26D10.11 |                | an ortholog of murine TMHS                        | 2 |  |
| Others  | F30A10.9  |                | rRNA-processing protein FCF1 homolog              | 2 |  |
| Others  | F45F2.9   |                | predicted hydrolase of HD superfamily             | 2 |  |
| Others  | F41E6.10  | <i>fip-4</i>   | fungus induced protein                            | 2 |  |
| Others  | C34G6.6   | <i>noah-1</i>  | a PAN and ZP domain-containing protein            | 2 |  |
| Others  | F20G4.1   | <i>smgl-1</i>  | SMG-associated and lethal                         | 2 |  |
| Others  | T02C12.1  | <i>hum-5</i>   | unconventional myosin                             | 1 |  |
| Others  | C27F2.8   |                | GPI-anchored cell surface glycoprotein            | 3 |  |
| Others  | F53F4.1   |                | RNA-binding protein that promotes elongation      | 2 |  |
| Others  | C33H5.7   | <i>swd-2.2</i> | WD repeat-containing protein                      | 2 |  |
| Others  | K01A11.2  |                | histidine protein methyltransferase 1 homolog     | 1 |  |
| Unknown | F58A6.5   |                | uncharacterized protein                           | 1 |  |
| Unknown | F58D2.2   |                | uncharacterized protein                           | 1 |  |
| Unknown | W02A2.8   |                | uncharacterized protein                           | 1 |  |
| Unknown | ZC168.2   |                | uncharacterized protein                           | 2 |  |
| Unknown | C45G9.5   |                | uncharacterized protein                           | 2 |  |
| Unknown | F48G7.4   |                | uncharacterized protein                           | 1 |  |
| Unknown | F54D11.3  |                | uncharacterized protein                           | 1 |  |
| Unknown | Y11D7A.1  |                | uncharacterized protein                           | 1 |  |
| Unknown | M88.3     |                | uncharacterized protein                           | 1 |  |
| Unknown | F26A1.8   |                | uncharacterized protein                           | 1 |  |
| Unknown | F54H12.4  |                | uncharacterized protein                           | 1 |  |
| Unknown | T20F10.4  |                | uncharacterized protein                           | 2 |  |
| Unknown | F44D12.4  |                | uncharacterized protein                           | 2 |  |
| Unknown | Y65B4BL.6 |                | uncharacterized protein                           | 3 |  |
| Unknown | F10E9.3   |                | uncharacterized protein                           | 2 |  |
| Unknown | ZK470.3   |                | uncharacterized protein                           | 2 |  |
| Unknown | Y76G2A.2  |                | uncharacterized protein                           | 2 |  |
| Unknown | M04D8.5   |                | uncharacterized protein                           | 1 |  |

Level 1: some SQST-1::GFP aggregates are detected in some intestinal cells in *rpl-43* mutants, but

the number is much lower and expression is much weaker than in *rpl-43* single mutants.

Level 2: a few SQST-1::GFP aggregates are detected in some intestinal cells in *rpl-43* mutants.

Level 3: complete disappearance of intestinal SQST-1::GFP aggregates in *rpl-43* mutants.
