# Supplementary material
Source: PubMed Central journal article supplement (PMC4197881)
Supplement: embr0015-0705-sd12.pdf [file embr0015-0705-sd12.pdf]

**Table S3 RNAi inactivations that lead to elevated expression of the *Phsp-4::GFP* reporter**

| Sequence name | Gene name       | Brief description of gene product                                          |
|---------------|-----------------|----------------------------------------------------------------------------|
| F19B6.2       | <i>ufd-1</i>    | protein involved in recognition of polyubiquitinated proteins              |
| F59E12.5      | <i>npl-4.2</i>  | ubiquitin-binding protein involved in protein degradation                  |
| C06A1.1       | <i>cdc-48.1</i> | an AAA ATPase homologous to yeast Cdc48 and mammalian p97/VCP              |
| C41C4.8       | <i>cdc-48.2</i> | an AAA ATPase that is one of two <i>C. elegans</i> p97/VCP/CDC48 homologs  |
| Y38A8.2       | <i>pbs-3</i>    | a B-type subunit of the 20S protease core particle of the 26S proteasome   |
| F23F12.6      | <i>rpt-3</i>    | an AAA ATPase subunit of the 19S regulatory particle of the 26S proteasome |
| C52E4.4       | <i>rpt-1</i>    | one of six ATPases of the 19S regulatory particle of the 26S proteasome    |
| C23G10.4      | <i>rpn-2</i>    | subunit RPN2/PSMD1 of the 26S proteasome regulatory complex                |
| F47D12.4      | <i>hmg-1.2</i>  | HMG box-containing protein                                                 |
| F31E3.1       | <i>ceh-20</i>   | homeobox family member                                                     |
| R02F2.2       |                 | Rho guanine nucleotide exchange factor 17                                  |
| K04E7.2       | <i>pep-2</i>    | a low affinity/high capacity oligopeptide transporter                      |
| Y6E2A.2       | <i>str-101</i>  | a seven-TM receptor                                                        |
| M03F4.6       |                 | a protein containing Ca <sup>2+</sup> -binding EGF-like domains            |
| F38E9.4       |                 | a protein involved in lipid storage                                        |
| Y11D7A.9      |                 | FGF receptor activating protein 1                                          |
| C04C3.3       | <i>pdhb-1</i>   | pyruvate dehydrogenase complex E1 beta subunit                             |
| F53F4.5       | <i>fmo-4</i>    | flavin-containing monooxygenase family member                              |
| F08C6.1       | <i>adt-2</i>    | disintegrin metalloproteinase with thrombospondin repeats                  |
| C09D1.1       | <i>unc-89</i>   | Ca <sup>2+</sup> /calmodulin-dependent protein kinase                      |
| F26A3.2       | <i>ncbp-2</i>   | nuclear cap-binding protein complex                                        |
| C24H11.7      | <i>gbf-1</i>    | Golgi-specific brefeldin A-resistance guanine nucleotide exchange factor 1 |
| C36B1.8       | <i>gls-1</i>    | transducer of the stress-activated PKC1-MPK1 signaling pathway             |
| Y65B4BR.5     | <i>icd-2</i>    | transcription factor containing NAC and TS-N domains                       |
